# Supplementary material for: Ultra-Processed Food as Mediator of the Association between Birthweight and Childhood Body Weight Outcomes: A Retrospective Cohort Study
Source: MDPI journal article supplement (doi:10.3390/nu15194178), 2023-09-27
Supplement: s1 [file s1]

# **Ultra-Processed Food as Mediator of the Association between Birthweight and Childhood Body Weight Outcomes: A Retrospective Cohort Study**

*Min Hou*<sup>1\*</sup>, *Chao Qiu*<sup>2\*</sup>

<sup>a</sup> School of Public Health, College of Medicine, Shanghai Jiao Tong University, 227 Chongqing South Road, Shanghai 200025, China

<sup>b</sup> College of Humanities, Jiangnan University, 1800 Lihu Road, Wuxi 214122, China

**Corresponding authors:** Min Hou (e-mail; [minhou@sjtu.edu.cn](mailto:minhou@sjtu.edu.cn)); Chao Qiu (e-mail; [Chao.Qiu@outlook.com](mailto:Chao.Qiu@outlook.com))

**Table S1.** Subgroups of UPF and unprocessed foods (NPF) and example foods

| UPF subgroup                 | Foods or Beverages included                                                                                                                                                                                                                                                                                                                                     |
|------------------------------|-----------------------------------------------------------------------------------------------------------------------------------------------------------------------------------------------------------------------------------------------------------------------------------------------------------------------------------------------------------------|
| Industrial grain foods       | Deep-fried bread stick, White bread, Whole wheat bread, Cake, Sweet dumplings, Sesame paste, breakfast oatmeal, biscuits                                                                                                                                                                                                                                        |
| Ready-to-eat and fast foods  | Pizza, Hamburger, Fried chicken                                                                                                                                                                                                                                                                                                                                 |
| Sweet snacks and sweets      | Chocolate, Candy, Haw flakes                                                                                                                                                                                                                                                                                                                                    |
| Meat snacks                  | Sliced dried beef                                                                                                                                                                                                                                                                                                                                               |
| Savory snacks                | Chips                                                                                                                                                                                                                                                                                                                                                           |
| Sugar sweetened beverages    | Sweetened fruit and vegetable juices, Carbonated drinks, Sweetened tea drinks                                                                                                                                                                                                                                                                                   |
| Dairy foods and products     | Sweetened yoghurt, Flavored yogurt, Dried milk with sugar, Soy milk, Chocolate milk, Cream                                                                                                                                                                                                                                                                      |
| Fast-food potato products    | French fries                                                                                                                                                                                                                                                                                                                                                    |
| Soy products                 | Dried tofu                                                                                                                                                                                                                                                                                                                                                      |
| Other ultraprocessed foods   | Liquid drink, Salted cucumber, Salted vegetables, Fermented Tofu                                                                                                                                                                                                                                                                                                |
| <b>NPF subgroup</b>          |                                                                                                                                                                                                                                                                                                                                                                 |
| Grains                       | Rice, Sticky rice, Porridge, Home-made noodles, Steamed bread                                                                                                                                                                                                                                                                                                   |
| Meat, Poultry, fish and eggs | Pork, Beef, Lamb, Pork ribs, Animal liver, Blood products, Chicken, Duck, Goose, Dove, Freshwater fish, Sea fish, Shrimp, Crab, Quail egg, Egg, Duck egg                                                                                                                                                                                                        |
| Milk and plain yogurt        | Milk, plain yogurt                                                                                                                                                                                                                                                                                                                                              |
| Fruits                       | Orange, Tangerine, Watermelon, Pineapple, Apple, Longan, Pear, Grape, Banana, Hami melon, Kiwi fruit, Strawberry                                                                                                                                                                                                                                                |
| Vegetables                   | Spinach, Chinese cabbage, Lettuce, Cauliflower, Broccoli, Purple cabbage, Cabbage, Amaranth, Lettuce, Rapeseed, Leek, Coriander, Celery, Onions, Garlic seedlings, Bean sprouts, Sweet potato, Potato, Lotus root, Garlic sprout, Wax gourd, Chayote, Cucumber, Pumpkin, Loofah, Courgette, Tomato, Pepper (green), Eggplant, Beans, Corn, Carrot, White radish |
| Mushroom and alga            | Lentinula edodes, Oyster mushroom, Nori, Kelp, Fungus                                                                                                                                                                                                                                                                                                           |
| Nuts, seeds, or legumes      | Soybean, Peas, Soybean, Mung bean, Red beans, Black beans, Peanut, Chestnut, Sesame                                                                                                                                                                                                                                                                             |
| Others                       | Vegetarian stuffed dumplings, Meat stuffed dumplings, Meat buns, Vegetable buns, Bean curd, Bean blossom tofu, Soy milk, Dried dates, Raisin, Dried persimmon, Green tea, Black tea, Coffee                                                                                                                                                                     |

**Table S2.** Results of sensitivity analyses for Association of Birthweight, UPF consumption with BMI, BMI z-score and Risk of Overweight and Obesity Among Children in Unadjusted Models and Adjusted Models without interaction

|                                    |                                        | BMI                          |                              | BMI z- score                 |                              | Risk of overweight or obesity |                              |
|------------------------------------|----------------------------------------|------------------------------|------------------------------|------------------------------|------------------------------|-------------------------------|------------------------------|
|                                    |                                        | $\beta$ coefficient (95% CI) | <i>P</i> -value <sup>b</sup> | $\beta$ coefficient (95% CI) | <i>P</i> -value <sup>b</sup> | OR (95% CI)                   | <i>P</i> -value <sup>b</sup> |
| <b>Birthweight</b>                 |                                        |                              |                              |                              |                              |                               |                              |
| unadjusted model                   | NBW                                    | Ref.                         | --                           | Ref.                         | --                           | Ref.                          | --                           |
|                                    | LBW                                    | 1.06(-0.24 to 2.36)          | 0.109                        | 0.48(-0.01 to 0.97)          | 0.055                        | 1.77 (0.78 to 4.05)           | 0.175                        |
|                                    | HBW                                    | 1.52(1.02 to 2.01)           | <b>&lt;0.001</b>             | 0.41(0.22 to 0.60)           | <b>&lt;0.001</b>             | 1.90 (1.38 to 2.62)           | <b>&lt;0.001</b>             |
|                                    | <i>P</i> -value <sup>b</sup>           | <b>&lt;0.001</b>             |                              | <b>&lt;0.001</b>             |                              | <b>&lt;0.001</b>              |                              |
| adjusted model                     | NBW                                    | Ref.                         | --                           | Ref.                         | --                           | Ref.                          | --                           |
|                                    | LBW                                    | 1.00(-0.86 to 2.86)          | 0.293                        | 0.39(-0.28 to 1.05)          | 0.260                        | 0.99(0.23 to 4.28)            | 0.991                        |
|                                    | HBW                                    | 1.00(0.40 to 1.59)           | <b>0.001</b>                 | 0.36 (0.15 to 0.58)          | <b>0.001</b>                 | 1.22(0.79 to 1.88)            | 0.377                        |
|                                    | <i>P</i> -value <sup>b</sup>           | <b>0.003</b>                 |                              | <b>0.003</b>                 |                              | 0.674                         |                              |
| <b>UPF Consumption<sup>a</sup></b> |                                        |                              |                              |                              |                              |                               |                              |
| unadjusted model                   | Q1                                     | Ref.                         | --                           | Ref.                         | --                           | Ref.                          | --                           |
|                                    | Q2                                     | 0.32(-0.22 to 0.85)          | 0.243                        | 0.10(-0.10 to 0.29)          | 0.345                        | 1.21(0.88 to 1.67)            | 0.233                        |
|                                    | Q3                                     | 0.48(-0.09 to 1.05)          | 0.097                        | 0.04(-0.17 to 0.25)          | 0.679                        | 1.25(0.90 to 1.75)            | 0.188                        |
|                                    | Q4                                     | 1.00(0.46 to 1.54)           | <b>0.000</b>                 | 0.26(0.06 to 0.46)           | <b>0.010</b>                 | 1.18(0.86 to 1.64)            | 0.151                        |
|                                    | <i>P</i> -value for trend <sup>b</sup> | <b>0.003</b>                 |                              | 0.065                        |                              | 0.531                         |                              |
| adjusted model                     | Q1                                     | Ref.                         | --                           | Ref.                         | --                           | Ref.                          | --                           |
|                                    | Q2                                     | 0.06(-0.64 to 0.75)          | 0.870                        | -0.03(-0.28 to 0.22)         | 0.827                        | 1.11(0.64 to 1.94)            | 0.709                        |
|                                    | Q3                                     | -0.17(-0.90 to 0.56)         | 0.652                        | -0.02(-0.29 to 0.24)         | 0.863                        | 1.18(0.66 to 2.11)            | 0.571                        |
|                                    | Q4                                     | 0.05(-0.65 to 0.75)          | 0.891                        | 0.03(-0.23 to 0.28)          | 0.845                        | 1.15(0.66 to 1.99)            | 0.630                        |
|                                    | <i>P</i> -value for trend <sup>b</sup> | 0.915                        |                              | 0.972                        |                              | 0.948                         |                              |

Abbreviation: BMI, body mass index; CI, confidence interval; UPF: Ultra-processed foods, Q: quartiles; NBW, normal birthweight; LBW, low birthweight; HBW, high birthweight.

<sup>a</sup> A set of cutoff points for quartiles of UPF consumption was defined at 14.4%, 22.4% and 28.0% of daily food intake.

<sup>b</sup> Generalized linear models were used to investigate associations of birthweight, UPFs consumption with BMI measures in unadjusted models, and further adjusted for child's age and sex (male or female), family income (annual incomes <80,000 RMB, 80,000 to 150,000 RMB, or  $\geq$  150,000 RMB); maternal education (less than high school, high school and general equivalency, college graduate and above), maternal BMI status (<18.5, 18.5 to 24, 24 to 28,  $\geq$ 28), physical activity (moderate to vigorous physical activity per day <30 minutes, 30 to 60 minutes, or  $\geq$  60minutes), child's total daily energy intake (continuous), breastfeeding (Never, <6 month,  $\geq$  6 months), gestational age (Preterm and early term, full term, late or post-term) and delivery mode (vaginal delivery, caesarean delivery).

NBW or Q1 as reference; *P*-value < 0.05 are in bold type.

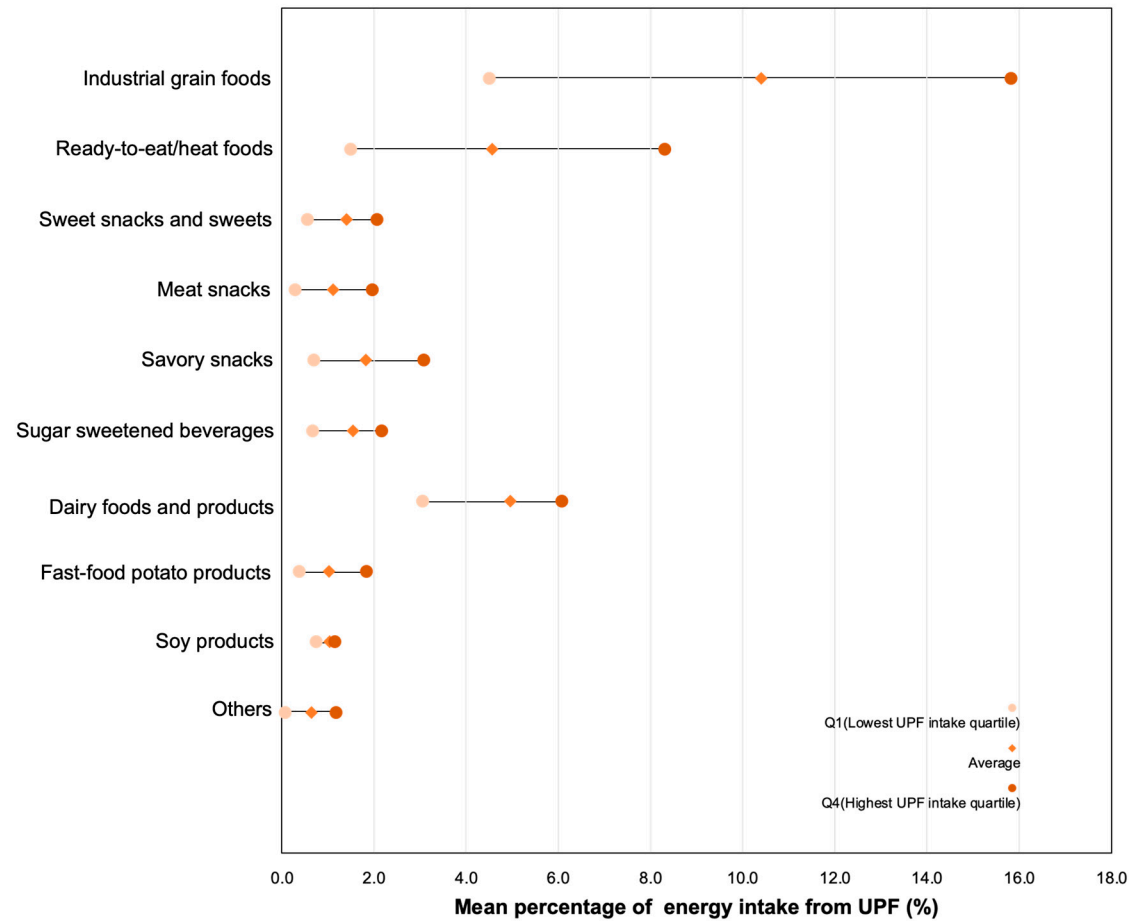

**Figure S1.** Contributions of food groups to the UPF Consumption Among Children

UPF: Ultra-processed foods, was defined as the proportion of its calorie from consumption of UPF subgroups relative to daily energy intake and was categorized into quartiles (Q1-Q4 represents lowest to highest quartile of percentage of energy intake from UPF consumption).

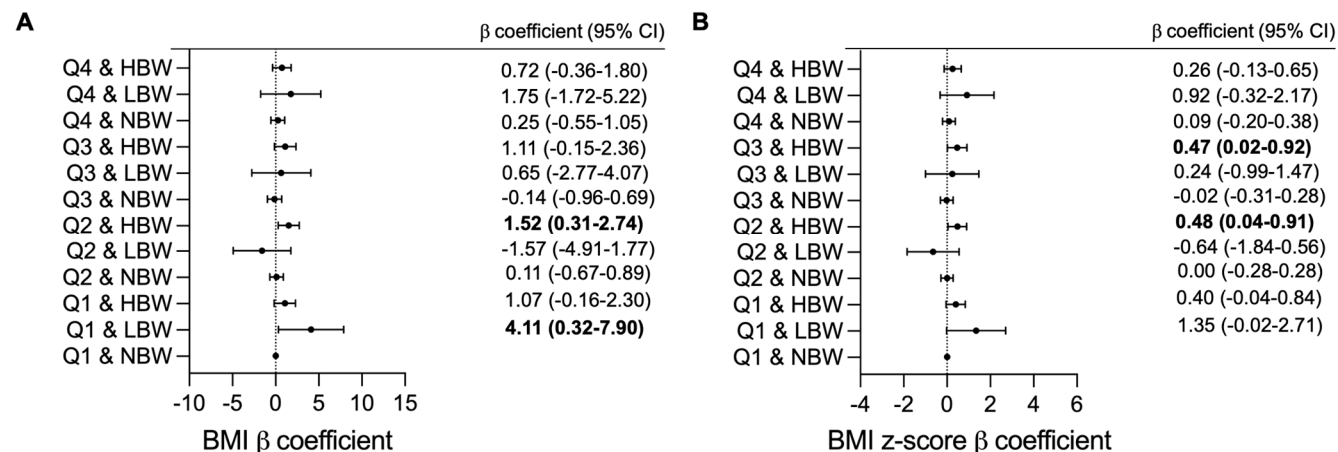

**Figure S2.** Adjusted  $\beta$  coefficient (95%CI) for childhood BMI measurements according to combined effect of birthweight and UPF consumption

Abbreviation: BMI, body mass index; CI, confidence interval; Q: quartile; NBW, normal birthweight; LBW, low birthweight; HBW, high birthweight.

UPF consumption defined as percentage of UPFs consumption according to the consumption of total daily ultra-processed foods

$\beta$  coefficient (95%CI) were calculated using a generalized linear model, adjusted for child's age and sex (male or female), family income (annual incomes <80,000 RMB, 80,000 to 150,000 RMB, or  $\geq 150,000$  RMB); maternal education (less than high school, high school and general equivalency, college graduate and above), maternal BMI status (<18.5, 18.5 to 24, 24 to 28,  $\geq 28$ ), physical activity (moderate to vigorous physical activity per day <30 minutes, 30 to 60 minutes, or  $\geq 60$  minutes), child's total daily energy intake (continuous), breastfeeding (Never, <6 month,  $\geq 6$  months), gestational age at delivery (Preterm and early term, full term, late or post-term) and delivery mode (vaginal delivery, caesarean delivery). Q1 & NBW as reference;  $P$ -value < 0.05 are in bold type.
